# Supplementary material for: The Maraichine Cattle Breed Supports Breeders and Researchers in the Atlantic Coastal Marshlands
Source: MDPI journal article supplement (doi:10.3390/ruminants2020011), 2022-04-01
Supplement: s1 [file s1]

Archive with 1 entries (1 files):
- ruminants-1556699-supplementary.pdf
